# Supplementary material for: Unsymmetrical hot electron heating in quasi-ballistic nanocontacts
Source: PubMed Central journal article supplement — Sci Rep. 2012 Jan 10;2:217. doi: 10.1038/srep00217 (PMC3253854; doi:10.1038/srep00217), 2012-01-10
Supplement: srep00217-s1.pdf [file srep00217-s1.pdf]

## **Supporting Online Material for**

### **Unsymmetrical hot electron heating in quasi-ballistic nanocontacts**

Makusu Tsutsui, Tomoji Kawai & Masateru Taniguchi

The Supplementary Information includes:

1. Supplementary Figures (Fig. S1-S3)

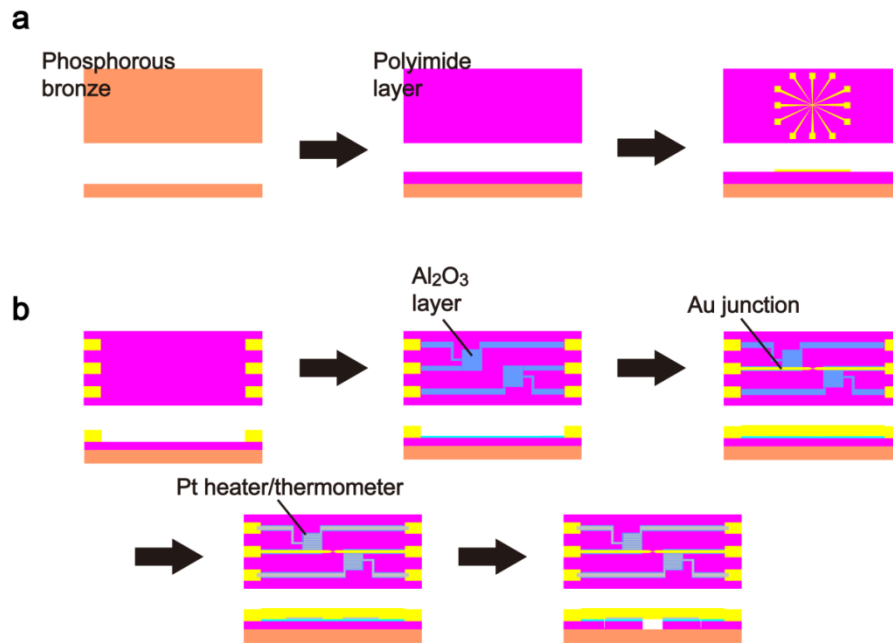

**Figure S1.** Fabrication procedure of micro-thermometer-embedded mechanically-controllable break junctions. **a**, Microscale electrodes were fabricated on the polyimide-coated phosphorous bronze substrate using photolithography and radio-frequency magnetron sputtering processes and subsequent lift-off. **b**, After that, Al<sub>2</sub>O<sub>3</sub> layers, Au junctions, and Pt thermometers/heaters were patterned in the 100  $\mu\text{m} \times 100 \mu\text{m}$  region at the center of the sample substrate using electron beam lithography and radio-frequency magnetron sputtering methods followed by lift-off processes. The sample was then exposed to the isotropic reactive ion etching. As a result, polyimide underneath the thin Au and Pt leads and junctions were removed making some parts of the structure free-standing.

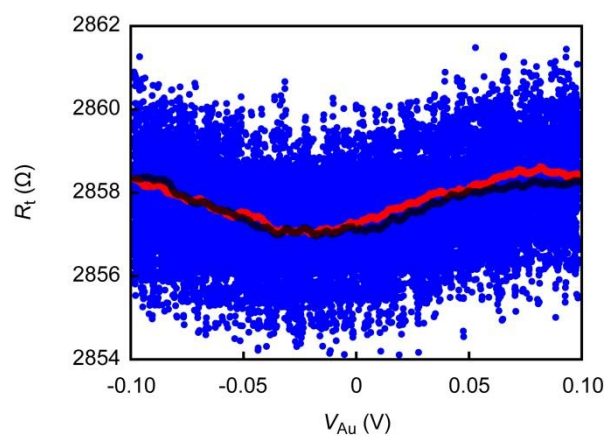

**Figure S2.** Raw data of  $R_t$  (blue) and corresponding  $\langle R_t \rangle$  (Black and Red) plotted as a function of  $V_{Au}$ . Although  $R_t$  fluctuates considerably, the overall dependence on  $V_{Au}$  is almost the same as that of  $\langle R_t \rangle$ .

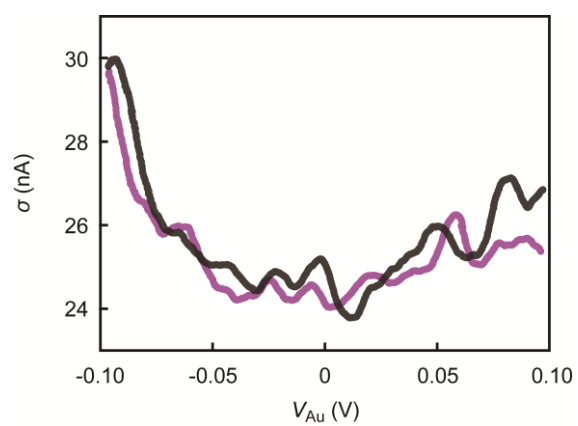

**Figure S3.** The current noise  $\sigma$  in the Au single-atom wire plotted as a function of the bias voltage  $V_{Au}$ .  $\sigma$  increases in a stepwise manner with  $|V_{Au}|$ .
